# Supplementary material
Source: PubMed Central journal article supplement (PMC6022810)
Supplement: NIHMS77124-supplement-Supplementary_tables.pdf [file NIHMS77124-supplement-Supplementary_tables.pdf]

**Supplementary Table 1:** Description of the baseline molecular phenotypes used in the study

| <b>Id</b>     | <b>Trait</b>                                 | <b>Category</b> |
|---------------|----------------------------------------------|-----------------|
| B_ADNC        | Androsteendion                               | hormones        |
| B_CORC        | Cortisol                                     | hormones        |
| B_DESC        | 11 deoxy cortisol                            | hormones        |
| B_OHP         | 17 hydroxy progesterone                      | hormones        |
| B_PROG        | Progesterone                                 | hormones        |
| B_TESC        | Testosterone                                 | hormones        |
| B_VITD        | 25 hydroxy vitamine D3                       | hormones        |
| B_TSH         | TSH                                          | hormones        |
| B_T4VR        | T4                                           | hormones        |
| IL18bpx       | Interleukin 18 binding protein               | modulators      |
| Resistin      | Resistin                                     | modulators      |
| Leptin        | Leptin                                       | modulators      |
| Adiponectin   | Adiponectin                                  | modulators      |
| AAT           | $\alpha$ 1 antitrepsin                       | modulators      |
| IL18          | Interleukin 18                               | modulators      |
| IgG           | IgG                                          | immunoglobulins |
| IgA           | IgA                                          | immunoglobulins |
| IgM           | IgM                                          | immunoglobulins |
| IgG2          | IgG2                                         | immunoglobulins |
| IgG3          | IgG3                                         | immunoglobulins |
| IgG4          | IgG4                                         | immunoglobulins |
| PLT_AP1       | Baseline P-selectin                          | platelets       |
| PLT_AF1       | Baseline Fibrinogen binding                  | platelets       |
| PLT_AP_AUC    | ADP P-selectin reactivity curve              | platelets       |
| PLT_AF_AUC    | ADP Fibrinogen binding reactivity curve      | platelets       |
| PLT_CP_AUC    | CRP P-selectin reactivity curve              | platelets       |
| PLT_CF_AUC    | CRP fibrinogen reactivity curve              | platelets       |
| PLT_PMC_med   | Platelet-monocyte complex                    | platelets       |
| COAG_TAT      | Coagulation markers                          | platelets       |
| PLT_bTG       | beta Thromboglobulin total concentrations    | platelets       |
| PLT_bTGperPLT | beta thromboglobulin per 1 million platelets | platelets       |
| IT1           | Granulocytes                                 | cellcounts      |
| IT2           | Monocytes (CD14+)                            | cellcounts      |
| IT3           | Classical monocytes (CD14++CD16-)            | cellcounts      |
| IT4           | Non-classical monocytes (CD14++CD16+)        | cellcounts      |
| IT5           | Intermediate monocytes (CD14+CD16+)          | cellcounts      |
| IT7           | T cells (CD3+ CD56-)                         | cellcounts      |
| IT8           | NK cells (CD3- CD56+)                        | cellcounts      |
| IT9           | NKT cells (CD3+ CD56+)                       | cellcounts      |
| IT10          | NA                                           | cellcounts      |
| IT11          | B cells (CD19+)                              | cellcounts      |
| IT12          | CD4+ T cells                                 | cellcounts      |
| IT13          | CD8+ T cells                                 | cellcounts      |
| IT14          | DP (CD4+ CD8+)                               | cellcounts      |
| IT15          | DN (CD4- CD8-)                               | cellcounts      |
| IT17          | NK dim (CD56+ CD16+)                         | cellcounts      |
| IT18          | NK bright (CD56++ CD16-)                     | cellcounts      |
| IT19          | NK (CD56+ CD16-)                             | cellcounts      |
| IT21          | Lymphocytes                                  | cellcounts      |
| IT29          | CD45RO- CD45RA+ T cells                      | cellcounts      |
| IT30          | CD45RO+ CD45RA+ T cells                      | cellcounts      |
| IT31          | CD45RO+ CD45RA- T cells                      | cellcounts      |
| IT32          | CD45RO- CD45RA- T cells                      | cellcounts      |
| IT33          | Treg CD25+ CD127low                          | cellcounts      |
| IT34          | CD4+ Naive CD45RA+ CD27+                     | cellcounts      |
| IT35          | CD4+ Eff CD45RA+ CD27-                       | cellcounts      |
| IT36          | CD4+ EM CD45RA- CD27-                        | cellcounts      |
| IT37          | CD4+ CM CD45RA- CD27+                        | cellcounts      |
| IT38          | CD4+ Naive CD45RO- CD27+                     | cellcounts      |
| IT39          | CD4+ Eff CD45RO- CD27-                       | cellcounts      |
| IT40          | CD4+ EM CD45RO+ CD27-                        | cellcounts      |
| IT41          | CD4+ CM CD45RO+ CD27+                        | cellcounts      |
| IT50          | CD8+ Naive CD45RA+ CD27+                     | cellcounts      |
| IT51          | CD8+ Eff CD45RA+ CD27-                       | cellcounts      |
| IT52          | CD8+ EM CD45RA- CD27-                        | cellcounts      |
| IT53          | CD8+ CM CD45RA- CD27+                        | cellcounts      |
| IT54          | CD8+ Naive CD45RO- CD27+                     | cellcounts      |
| IT55          | CD8+ Eff CD45RO- CD27-                       | cellcounts      |
| IT56          | CD8+ EM CD45RO+ CD27-                        | cellcounts      |
| IT57          | CD8+ CM CD45RO+ CD27+                        | cellcounts      |

|      |                                               |            |
|------|-----------------------------------------------|------------|
| IT58 | IgD- IgM+                                     | cellcounts |
| IT59 | IgD+ IgM+                                     | cellcounts |
| IT60 | IgD+ IgM-                                     | cellcounts |
| IT61 | IgD- IgM-                                     | cellcounts |
| IT62 | Plasmablast (IgD- IgM- CD38++)                | cellcounts |
| IT63 | Class switched memory (IgD- IgM- CD38+ CD27+) | cellcounts |
| IT64 | IgD- IgM- CD27-                               | cellcounts |
| IT65 | NaiveB cells (IgD+ IgM+ CD27-)                | cellcounts |
| IT66 | Memory B cells (IgD+ IgM+ CD27+)              | cellcounts |
| IT67 | IgD- IgM+ CD27-                               | cellcounts |
| IT68 | IgM only memory (IgD- IgM+ CD27)              | cellcounts |
| IT69 | CD24+ CD38+                                   | cellcounts |
| IT70 | Transitional B cells (CD24++ CD38++)          | cellcounts |
| IT71 | Naive mature B cells (CD24+ CD38+ CD27- IgM+) | cellcounts |
| IT72 | CD24+ CD38+ CD27+ IgM+                        | cellcounts |
| IT73 | IgM-                                          | cellcounts |
| IT74 | IgM only B cells (CD24+ CD38+ CD27+ IgM+ )    | cellcounts |
| IT75 | Natural effector (CD24+ CD38+ IgD+ IgM+)      | cellcounts |
| IT76 | IgM+                                          | cellcounts |
| IT77 | IgM+ CD38++ CD27+                             | cellcounts |
| IT78 | Class non switched memory (IgM+ CD38+ CD27+)  | cellcounts |
| IT79 | IgM+ CD27-                                    | cellcounts |
| IT80 | CD19+ CD20- Plasma blasts/cells               | cellcounts |
| IT81 | CD19+ CD20+ B cells                           | cellcounts |
| IT82 | IgD- CD5++                                    | cellcounts |
| IT83 | IgD+ CD5++                                    | cellcounts |
| IT84 | IgD- CD5+                                     | cellcounts |
| IT85 | IgD+ CD5+                                     | cellcounts |
| IT86 | Prol DN(CD4-CD8-)                             | cellcounts |
| IT87 | Prol DP(CD4+CD8+)                             | cellcounts |
| IT88 | Prol CD4+ Tconv                               | cellcounts |
| IT89 | Prol CD4+ Treg                                | cellcounts |
| IT90 | Prol CD8                                      | cellcounts |
| IT93 | Treg CD45RA+                                  | cellcounts |
| IT94 | Treg CD45RA-                                  | cellcounts |
| IT95 | Treg HLA-DR+                                  | cellcounts |

**Supplementary Table 2:** Description of all cytokine stimulation pairs used in the study

| <b>Id</b>                             | <b>Cytokine</b> | <b>Stimulation</b> | <b>Tissue</b> | <b>Time</b> | <b>Stimulation type</b> |
|---------------------------------------|-----------------|--------------------|---------------|-------------|-------------------------|
| IL6_LPS_macroPG_24h                   | IL6             | LPS                | macroPG       | 24h         | TLR ligands             |
| IL6_S.typhimurium_macroPG_24h         | IL6             | S.typhimurium      | macroPG       | 24h         | Bacteria                |
| TNFA_S.typhimurium_macroPG_24h        | TNFA            | S.typhimurium      | macroPG       | 24h         | Bacteria                |
| IL1b_S.aureus_PBMC_24h                | IL1b            | S.aureus           | PBMC          | 24h         | Bacteria                |
| IL6_S.aureus_PBMC_24h                 | IL6             | S.aureus           | PBMC          | 24h         | Bacteria                |
| TNFA_S.aureus_PBMC_24h                | TNFA            | S.aureus           | PBMC          | 24h         | Bacteria                |
| IFNy_S.aureus_PBMC_7days              | IFNy            | S.aureus           | PBMC          | 7days       | Bacteria                |
| IL22_S.aureus_PBMC_7days              | IL22            | S.aureus           | PBMC          | 7days       | Bacteria                |
| IL6_S.aureus_WB_48h                   | IL6             | S.aureus           | WB            | 48h         | Bacteria                |
| TNFA_S.aureus_WB_48h                  | TNFA            | S.aureus           | WB            | 48h         | Bacteria                |
| IFNy_S.aureus_WB_48h                  | IFNy            | S.aureus           | WB            | 48h         | Bacteria                |
| IL1b_S.aureus_WB_48h                  | IL1b            | S.aureus           | WB            | 48h         | Bacteria                |
| IL6_PolyIC_PBMC_24h                   | IL6             | PolyIC             | PBMC          | 24h         | TLR ligands             |
| IL1b_PolyIC_PBMC_24h                  | IL1b            | PolyIC             | PBMC          | 24h         | TLR ligands             |
| IL6_PHA_WB_48h                        | IL6             | PHA                | WB            | 48h         | Non microbial           |
| TNFA_PHA_WB_48h                       | TNFA            | PHA                | WB            | 48h         | Non microbial           |
| IFNy_PHA_WB_48h                       | IFNy            | PHA                | WB            | 48h         | Non microbial           |
| IL1b_PHA_WB_48h                       | IL1b            | PHA                | WB            | 48h         | Non microbial           |
| IL6_Pam3Cys_PBMC_24h                  | IL6             | Pam3Cys            | PBMC          | 24h         | TLR ligands             |
| TNFA_Pam3Cys_PBMC_24h                 | TNFA            | Pam3Cys            | PBMC          | 24h         | TLR ligands             |
| IL6_MTB_macroPG_24h                   | IL6             | MTB                | macroPG       | 24h         | Bacteria                |
| TNFA_MTB_macroPG_24h                  | TNFA            | MTB                | macroPG       | 24h         | Bacteria                |
| IL1b_MTB_PBMC_24h                     | IL1b            | MTB                | PBMC          | 24h         | Bacteria                |
| IL6_MTB_PBMC_24h                      | IL6             | MTB                | PBMC          | 24h         | Bacteria                |
| IFNy_MTB_PBMC_7days                   | IFNy            | MTB                | PBMC          | 7days       | Bacteria                |
| IL17_MTB_PBMC_7days                   | IL17            | MTB                | PBMC          | 7days       | Bacteria                |
| IL22_MTB_PBMC_7days                   | IL22            | MTB                | PBMC          | 7days       | Bacteria                |
| IL6_MSUC16_PBMC_24h                   | IL6             | MSUC16             | PBMC          | 24h         | Non microbial           |
| TNFA_MSUC16_PBMC_24h                  | TNFA            | MSUC16             | PBMC          | 24h         | Non microbial           |
| IL1b_MSUC16_PBMC_24h                  | IL1b            | MSUC16             | PBMC          | 24h         | Non microbial           |
| IL1b_LPS1ng_PBMC_24h                  | IL1b            | LPS1ng             | PBMC          | 24h         | TLR ligands             |
| IL6_LPS1ng_PBMC_24h                   | IL6             | LPS1ng             | PBMC          | 24h         | TLR ligands             |
| IL6_LPS100ng_PBMC_24h                 | IL6             | LPS                | PBMC          | 24h         | TLR ligands             |
| IL1b_LPS100ng_PBMC_24h                | IL1b            | LPS                | PBMC          | 24h         | TLR ligands             |
| TNFA_LPS100ng_PBMC_24h                | TNFA            | LPS                | PBMC          | 24h         | TLR ligands             |
| TNFA_LPS_macroPG_24h                  | TNFA            | LPS                | macroPG       | 24h         | TLR ligands             |
| IFNy_LPS_WB_48h                       | IFNy            | LPS                | WB            | 48h         | TLR ligands             |
| TNFA_LPS_WB_48h                       | TNFA            | LPS                | WB            | 48h         | TLR ligands             |
| IL1b_LPS_WB_48h                       | IL1b            | LPS                | WB            | 48h         | TLR ligands             |
| IL6_LPS_WB_48h                        | IL6             | LPS                | WB            | 48h         | TLR ligands             |
| IL6_Influenza_PBMC_24h                | IL6             | Influenza          | PBMC          | 24h         | Virus                   |
| TNFA_Influenza_PBMC_24h               | TNFA            | Influenza          | PBMC          | 24h         | Virus                   |
| IL1b_Influenza_PBMC_24h               | IL1b            | Influenza          | PBMC          | 24h         | Virus                   |
| IL6_E.Coli_PBMC_24h                   | IL6             | E.Coli             | PBMC          | 24h         | Bacteria                |
| TNFA_E.Coli_PBMC_24h                  | TNFA            | E.Coli             | PBMC          | 24h         | Bacteria                |
| IL1b_E.Coli_PBMC_24h                  | IL1b            | E.Coli             | PBMC          | 24h         | Bacteria                |
| IL1b_Cryptococcus_PBMC_24h            | IL1b            | Cryptococcus       | PBMC          | 24h         | Fungi                   |
| IL6_Cryptococcus_PBMC_24h             | IL6             | Cryptococcus       | PBMC          | 24h         | Fungi                   |
| TNFA_Cryptococcus_PBMC_24h            | TNFA            | Cryptococcus       | PBMC          | 24h         | Fungi                   |
| IFNy_Cryptococcus_PBMC_7days          | IFNy            | Cryptococcus       | PBMC          | 7days       | Fungi                   |
| IL17_Cryptococcus_PBMC_7days          | IL17            | Cryptococcus       | PBMC          | 7days       | Fungi                   |
| IL22_Cryptococcus_PBMC_7days          | IL22            | Cryptococcus       | PBMC          | 7days       | Fungi                   |
| IL6_CpG_PBMC_24h                      | IL6             | CpG                | PBMC          | 24h         | TLR ligands             |
| IL1b_C.burnetiininemileSerum_PBMC_24h | IL1b            | C.burnetiininemile | PBMC          | 24h         | Bacteria                |
| IL6_C.burnetiininemileSerum_PBMC_24h  | IL6             | C.burnetiininemile | PBMC          | 24h         | Bacteria                |
| TNFA_C.burnetiininemileSerum_PBMC_24h | TNFA            | C.burnetiininemile | PBMC          | 24h         | Bacteria                |
| IL1b_C.albicanshyphae_PBMC_24h        | IL1b            | C.albicanshyphae   | PBMC          | 24h         | Fungi                   |
| IL6_C.albicanshyphae_PBMC_24h         | IL6             | C.albicanshyphae   | PBMC          | 24h         | Fungi                   |
| TNFA_C.albicanshyphae_PBMC_24h        | TNFA            | C.albicanshyphae   | PBMC          | 24h         | Fungi                   |
| IFNy_C.albicanshyphae_PBMC_7days      | IFNy            | C.albicanshyphae   | PBMC          | 7days       | Fungi                   |
| IL17_C.albicanshyphae_PBMC_7days      | IL17            | C.albicanshyphae   | PBMC          | 7days       | Fungi                   |
| IL22_C.albicanshyphae_PBMC_7days      | IL22            | C.albicanshyphae   | PBMC          | 7days       | Fungi                   |
| IL6_C.conidiaHK_WB_48h                | IL6             | C.albicansconidia  | WB            | 48h         | Fungi                   |
| TNFA_C.conidiaHK_WB_48h               | TNFA            | C.albicansconidia  | WB            | 48h         | Fungi                   |
| IFNy_C.conidiaHK_WB_48h               | IFNy            | C.albicansconidia  | WB            | 48h         | Fungi                   |
| IL1b_C.conidiaHK_WB_48h               | IL1b            | C.albicansconidia  | WB            | 48h         | Fungi                   |
| IL6_C.albicansconidia_macroPG_24h     | IL6             | C.albicansconidia  | macroPG       | 24h         | Fungi                   |
| TNFA_C.albicansconidia_macroPG_24h    | TNFA            | C.albicansconidia  | macroPG       | 24h         | Fungi                   |
| IL6_C.albicansconidia_PBMC_24h        | IL6             | C.albicansconidia  | PBMC          | 24h         | Fungi                   |
| TNFA_C.albicansconidia_PBMC_24h       | TNFA            | C.albicansconidia  | PBMC          | 24h         | Fungi                   |
| IFNy_C.albicansconidia_PBMC_7days     | IFNy            | C.albicansconidia  | PBMC          | 7days       | Fungi                   |
| IL17_C.albicansconidia_PBMC_7days     | IL17            | C.albicansconidia  | PBMC          | 7days       | Fungi                   |

|                                       |      |                    |      |       |          |
|---------------------------------------|------|--------------------|------|-------|----------|
| IL22_C.albicansconidia_PBMC_7days     | IL22 | C.albicansconidia  | PBMC | 7days | Fungi    |
| IL1b_C.albicansconidia_PBMC_24h       | IL1b | C.albicansconidia  | PBMC | 24h   | Fungi    |
| IL6_Borrelia PBMC_24h                 | IL6  | Borrelia           | PBMC | 24h   | Bacteria |
| IFNy_Borrelia PBMC_7days              | IFNy | Borrelia           | PBMC | 7days | Bacteria |
| IL22_Borrelia PBMC_7days              | IL22 | Borrelia           | PBMC | 7days | Bacteria |
| IL1b_Borrelia PBMC_24h                | IL1b | Borrelia           | PBMC | 24h   | Bacteria |
| IFNy_Bacteroides_PBMC_7days           | IFNy | Bacteroides        | PBMC | 7days | Bacteria |
| IL17_Bacteroides_PBMC_7days           | IL17 | Bacteroides        | PBMC | 7days | Bacteria |
| IL22_Bacteroides_PBMC_7days           | IL22 | Bacteroides        | PBMC | 7days | Bacteria |
| IL1b_B.fragilis_PBMC_24h              | IL1b | B.fragilis         | PBMC | 24h   | Bacteria |
| IL6_B.fragilis_PBMC_24h               | IL6  | B.fragilis         | PBMC | 24h   | Bacteria |
| IL6_B.burgdorferi_PBMC_24h            | IL6  | B.burgdorferi      | PBMC | 24h   | Bacteria |
| IFNy_B.burgdorferi_PBMC_7days         | IFNy | B.burgdorferi      | PBMC | 7days | Bacteria |
| IL22_B.burgdorferi_PBMC_7days         | IL22 | B.burgdorferi      | PBMC | 7days | Bacteria |
| IL1b_B.burgdorferi_PBMC_24h           | IL1b | B.burgdorferi      | PBMC | 24h   | Bacteria |
| IL6_A.fumigatusconidiaSerum_PBMC_24h  | IL6  | A.fumigatusconidia | PBMC | 24h   | Fungi    |
| TNFA_A.fumigatusconidiaSerum_PBMC_24h | TNFA | A.fumigatusconidia | PBMC | 24h   | Fungi    |
| IFNy_A.fumigatusconidia_PBMC_7days    | IFNy | A.fumigatusconidia | PBMC | 7days | Fungi    |
| IL22_A.fumigatusconidia_PBMC_7days    | IL22 | A.fumigatusconidia | PBMC | 7days | Fungi    |

**Supplementary Table 3:** Results of GO term enrichment of top 75 most varying genes after correcting age, gender and seasonal effects. Table shows enrichment of top 75 most varying genes in GO terms for FDR<0.05

| GO biological process                     | # genes<br>in<br>reference | #<br>genes<br>in top<br>75 | #<br>expected | Fold<br>Enrichment | Direction | Raw P value | FDR      |
|-------------------------------------------|----------------------------|----------------------------|---------------|--------------------|-----------|-------------|----------|
| positive regulation of toll-like receptor | 3                          | 2                          | 0.01          | > 100              | "+"       | 6.16E-05    | 2.73E-02 |
| regulation of toll-like receptor 7        | 4                          | 2                          | 0.01          | > 100              | "+"       | 9.23E-05    | 3.98E-02 |
| regulation of immune response             | 1049                       | 14                         | 2.64          | 5.3                | "+"       | 2.38E-07    | 5.26E-04 |
| regulation of immune system process       | 1531                       | 16                         | 3.86          | 4.15               | "+"       | 7.12E-07    | 6.49E-04 |
| positive regulation of toll-like receptor | 20                         | 3                          | 0.05          | 59.55              | "+"       | 2.56E-05    | 1.20E-02 |
| positive regulation of immune response    | 750                        | 12                         | 1.89          | 6.35               | "+"       | 3.09E-07    | 6.00E-04 |
| positive regulation of immune system      | 1037                       | 12                         | 2.61          | 4.59               | "+"       | 8.64E-06    | 5.15E-03 |
| antibacterial humoral response            | 37                         | 4                          | 0.09          | 42.92              | "+"       | 3.36E-06    | 2.37E-03 |
| humoral immune response                   | 312                        | 7                          | 0.79          | 8.91               | "+"       | 1.44E-05    | 7.19E-03 |
| immune response                           | 1720                       | 23                         | 4.33          | 5.31               | "+"       | 5.90E-12    | 9.15E-08 |
| immune system process                     | 2575                       | 23                         | 6.49          | 3.55               | "+"       | 1.66E-08    | 6.44E-05 |
| defense response                          | 1255                       | 17                         | 3.16          | 5.38               | "+"       | 6.73E-09    | 3.48E-05 |
| response to stress                        | 3358                       | 22                         | 8.46          | 2.6                | "+"       | 8.52E-06    | 5.29E-03 |
| defense response to fungus                | 38                         | 4                          | 0.1           | 41.79              | "+"       | 3.70E-06    | 2.50E-03 |
| response to fungus                        | 51                         | 4                          | 0.13          | 31.14              | "+"       | 1.10E-05    | 5.69E-03 |
| killing of cells of other organism        | 50                         | 4                          | 0.13          | 31.76              | "+"       | 1.02E-05    | 5.47E-03 |
| cell killing                              | 79                         | 5                          | 0.2           | 25.13              | "+"       | 2.19E-06    | 1.79E-03 |
| disruption of cells of other organism     | 50                         | 4                          | 0.13          | 31.76              | "+"       | 1.02E-05    | 5.67E-03 |
| innate immune response                    | 707                        | 15                         | 1.78          | 8.42               | "+"       | 1.67E-10    | 1.30E-06 |
| neutrophil degranulation                  | 483                        | 10                         | 1.22          | 8.22               | "+"       | 3.51E-07    | 6.06E-04 |
| neutrophil mediated immunity              | 496                        | 10                         | 1.25          | 8                  | "+"       | 4.46E-07    | 5.76E-04 |
| myeloid leukocyte mediated immunity       | 517                        | 10                         | 1.3           | 7.68               | "+"       | 6.46E-07    | 6.26E-04 |
| leukocyte mediated immunity               | 736                        | 13                         | 1.85          | 7.01               | "+"       | 2.91E-08    | 7.52E-05 |
| immune effector process                   | 1026                       | 15                         | 2.58          | 5.8                | "+"       | 2.42E-08    | 7.52E-05 |
| leukocyte degranulation                   | 505                        | 10                         | 1.27          | 7.86               | "+"       | 5.24E-07    | 5.80E-04 |
| regulated exocytosis                      | 688                        | 10                         | 1.73          | 5.77               | "+"       | 7.94E-06    | 5.13E-03 |
| exocytosis                                | 772                        | 10                         | 1.94          | 5.14               | "+"       | 2.13E-05    | 1.03E-02 |
| neutrophil activation involved in         | 485                        | 10                         | 1.22          | 8.19               | "+"       | 3.65E-07    | 5.66E-04 |
| myeloid cell activation involved in       | 514                        | 10                         | 1.29          | 7.72               | "+"       | 6.13E-07    | 6.34E-04 |
| leukocyte activation involved in          | 606                        | 10                         | 1.53          | 6.55               | "+"       | 2.63E-06    | 2.04E-03 |
| leukocyte activation                      | 873                        | 11                         | 2.2           | 5                  | "+"       | 9.98E-06    | 5.73E-03 |
| cell activation                           | 1019                       | 11                         | 2.57          | 4.29               | "+"       | 4.11E-05    | 1.88E-02 |
| cell activation involved in immune        | 610                        | 10                         | 1.54          | 6.51               | "+"       | 2.79E-06    | 2.06E-03 |
| myeloid leukocyte activation              | 564                        | 10                         | 1.42          | 7.04               | "+"       | 1.40E-06    | 1.21E-03 |
| neutrophil activation                     | 493                        | 10                         | 1.24          | 8.05               | "+"       | 4.22E-07    | 5.95E-04 |
| granulocyte activation                    | 497                        | 10                         | 1.25          | 7.99               | "+"       | 4.54E-07    | 5.42E-04 |

**Supplementary Table 4:** Comparison between real and permuted estimates of explained variation by genetics. Estimates are given as measured by the adjusted R<sup>2</sup>The column delta indicates the difference between the mean of the permuted distribution and the real estimate.

| <b>Cytokine stimulation pair</b>      | <b>Real estimate</b> | <b>Mean permuted estimate</b> | <b>Delta</b> | <b>Significant p &lt; 0.05</b> |
|---------------------------------------|----------------------|-------------------------------|--------------|--------------------------------|
| IL6_C.burnetiininemileSerum_PBMC_24h  | 0,4416               | 0,1748                        | 0,2668       | TRUE                           |
| IL6_PolyIC_PBMC_24h                   | 0,3579               | 0,0590                        | 0,2989       | TRUE                           |
| TNFA_LPS_macroPG_24h                  | 0,3491               | 0,0485                        | 0,3006       | TRUE                           |
| IL6_MTB_macroPG_24h                   | 0,3332               | 0,0444                        | 0,2888       | TRUE                           |
| IL6_LPS100ng_PBMC_24h                 | 0,3161               | 0,1250                        | 0,1910       | TRUE                           |
| IL1b_Cryptococcus_PBMC_24h            | 0,3087               | 0,0537                        | 0,2550       | TRUE                           |
| IL6_B.fragilis_PBMC_24h               | 0,3048               | 0,0608                        | 0,2440       | TRUE                           |
| IL1b_S.aureus_PBMC_24h                | 0,2961               | 0,0445                        | 0,2516       | TRUE                           |
| TNFA_S.aureus_PBMC_24h                | 0,2863               | 0,0507                        | 0,2355       | TRUE                           |
| IL1b_C.burnetiininemileSerum_PBMC_24h | 0,2821               | 0,0529                        | 0,2292       | TRUE                           |
| IFNy_C.albicanshyphae_PBMC_7days      | 0,2728               | 0,0514                        | 0,2214       | TRUE                           |
| IFNy_Cryptococcus_PBMC_7days          | 0,2679               | 0,0525                        | 0,2153       | TRUE                           |
| IL22_Cryptococcus_PBMC_7days          | 0,2633               | 0,0474                        | 0,2159       | TRUE                           |
| TNFA_Cryptococcus_PBMC_24h            | 0,2616               | 0,0614                        | 0,2002       | TRUE                           |
| TNFA_E.Coli_PBMC_24h                  | 0,2578               | 0,1012                        | 0,1566       | TRUE                           |
| IL1b_S.aureus_WB_48h                  | 0,2460               | 0,0464                        | 0,1996       | TRUE                           |
| TNFA_C.albicanshyphae_PBMC_24h        | 0,2448               | 0,0429                        | 0,2019       | TRUE                           |
| TNFA_S.typhimurium_macroPG_24h        | 0,2429               | 0,0440                        | 0,1989       | TRUE                           |
| IL17_Bacteroides_PBMC_7days           | 0,2407               | 0,0458                        | 0,1949       | TRUE                           |
| IL6_CpG_PBMC_24h                      | 0,2362               | 0,0616                        | 0,1746       | TRUE                           |
| IL6_Cryptococcus_PBMC_24h             | 0,2357               | 0,0540                        | 0,1818       | TRUE                           |
| IL6_S.aureus_PBMC_24h                 | 0,2345               | 0,0611                        | 0,1734       | TRUE                           |
| IL6_C.albicansconidia_macroPG_24h     | 0,2344               | 0,0458                        | 0,1886       | TRUE                           |
| IL1b_E.Coli_PBMC_24h                  | 0,2304               | 0,0458                        | 0,1846       | TRUE                           |
| TNFA_MTB_macroPG_24h                  | 0,2280               | 0,0490                        | 0,1791       | TRUE                           |
| TNFA_C.burnetiininemileSerum_PBMC_24h | 0,2236               | 0,0504                        | 0,1732       | TRUE                           |
| IL17_MTB_PBMC_7days                   | 0,2191               | 0,0485                        | 0,1707       | TRUE                           |
| TNFA_S.aureus_WB_48h                  | 0,2137               | 0,0484                        | 0,1653       | TRUE                           |
| IL1b_PolyIC_PBMC_24h                  | 0,2132               | 0,0536                        | 0,1596       | TRUE                           |
| IL17_Cryptococcus_PBMC_7days          | 0,2117               | 0,0559                        | 0,1557       | TRUE                           |
| IL6_C.albicansconidia_PBMC_24h        | 0,2079               | 0,0559                        | 0,1520       | TRUE                           |
| IL6_MTB_PBMC_24h                      | 0,2076               | 0,0555                        | 0,1521       | TRUE                           |
| IL6_E.Coli_PBMC_24h                   | 0,2058               | 0,0791                        | 0,1267       | TRUE                           |
| IL6_A.fumigatusconidiaSerum_PBMC_24h  | 0,2057               | 0,0936                        | 0,1121       | FALSE                          |
| IL6_LPS1ng_PBMC_24h                   | 0,1992               | 0,0546                        | 0,1446       | TRUE                           |
| IL1b_MTB_PBMC_24h                     | 0,1919               | 0,0489                        | 0,1429       | TRUE                           |
| IL6_S.aureus_WB_48h                   | 0,1865               | 0,0504                        | 0,1361       | TRUE                           |
| IL1b_C.albicanshyphae_PBMC_24h        | 0,1839               | 0,0448                        | 0,1391       | TRUE                           |
| IFNy_Bacteroides_PBMC_7days           | 0,1829               | 0,0529                        | 0,1300       | TRUE                           |
| IL22_C.albicansconidia_PBMC_7days     | 0,1823               | 0,0437                        | 0,1386       | TRUE                           |
| IL22_Borrelia PBMC_7days              | 0,1822               | 0,0444                        | 0,1378       | TRUE                           |
| IL17_C.albicanshyphae_PBMC_7days      | 0,1785               | 0,0425                        | 0,1360       | TRUE                           |
| IFNy_B.burgdorferi_PBMC_7days         | 0,1783               | 0,0439                        | 0,1344       | TRUE                           |
| IL17_C.albicansconidia_PBMC_7days     | 0,1780               | 0,0437                        | 0,1343       | TRUE                           |
| IL1b_PHA_WB_48h                       | 0,1762               | 0,0431                        | 0,1331       | TRUE                           |
| IL6_PHA_WB_48h                        | 0,1711               | 0,0439                        | 0,1272       | TRUE                           |
| TNFA_C.albicansconidia_PBMC_24h       | 0,1705               | 0,0763                        | 0,0942       | TRUE                           |
| IL1b_Borrelia PBMC_24h                | 0,1694               | 0,0478                        | 0,1216       | TRUE                           |
| TNFA_MSUC16_PBMC_24h                  | 0,1691               | 0,0543                        | 0,1148       | TRUE                           |
| IFNy_Borrelia PBMC_7days              | 0,1605               | 0,0559                        | 0,1046       | TRUE                           |
| IL1b_C.albicansconidia_PBMC_24h       | 0,1562               | 0,0463                        | 0,1099       | TRUE                           |
| IFNy_C.albicansconidia_PBMC_7days     | 0,1463               | 0,0398                        | 0,1065       | TRUE                           |
| IL1b_LPS_WB_48h                       | 0,1461               | 0,0388                        | 0,1073       | TRUE                           |
| IL22_A.fumigatusconidia_PBMC_7days    | 0,1448               | 0,0599                        | 0,0849       | FALSE                          |
| IL6_B.burgdorferi_PBMC_24h            | 0,1438               | 0,0637                        | 0,0800       | FALSE                          |
| IFNy_S.aureus_PBMC_7days              | 0,1423               | 0,0429                        | 0,0994       | TRUE                           |
| IL1b_C.conidiaHK_WB_48h               | 0,1419               | 0,0457                        | 0,0961       | TRUE                           |
| IL1b_B.burgdorferi_PBMC_24h           | 0,1410               | 0,0474                        | 0,0936       | TRUE                           |
| IFNy_A.fumigatusconidia_PBMC_7days    | 0,1381               | 0,0620                        | 0,0760       | FALSE                          |
| IL6_MSUC16_PBMC_24h                   | 0,1361               | 0,0646                        | 0,0715       | FALSE                          |
| IL6_Pam3Cys_PBMC_24h                  | 0,1361               | 0,0781                        | 0,0580       | FALSE                          |
| IL1b_Influenza_PBMC_24h               | 0,1317               | 0,0480                        | 0,0838       | FALSE                          |
| IFNy_MTB_PBMC_7days                   | 0,1314               | 0,0412                        | 0,0902       | TRUE                           |
| IFNy_S.aureus_WB_48h                  | 0,1287               | 0,0415                        | 0,0872       | TRUE                           |
| IL22_MTB_PBMC_7days                   | 0,1262               | 0,0437                        | 0,0825       | TRUE                           |
| IL1b_LPS100ng_PBMC_24h                | 0,1250               | 0,0495                        | 0,0755       | FALSE                          |
| TNFA_Pam3Cys_PBMC_24h                 | 0,1221               | 0,0444                        | 0,0777       | FALSE                          |
| IL22_C.albicanshyphae_PBMC_7days      | 0,1192               | 0,0653                        | 0,0539       | FALSE                          |

|                                      |        |    |        |         |       |
|--------------------------------------|--------|----|--------|---------|-------|
| TNFA_PHA_WB_48h                      | 0,1191 |    | 0,0371 | 0,0820  | TRUE  |
| IL6_Borrelia_PBM_24h                 | 0,1176 |    | 0,0626 | 0,0549  | FALSE |
| IL6_C.conidiaHK_WB_48h               | 0,1170 |    | 0,0700 | 0,0470  | FALSE |
| IL6_LPS_WB_48h                       | 0,1122 |    | 0,0427 | 0,0695  | FALSE |
| IFNy_LPS_WB_48h                      | 0,1092 |    | 0,0391 | 0,0701  | FALSE |
| IL22_S.aureus_PBM_7days              | 0,1043 |    | 0,0446 | 0,0597  | FALSE |
| TNFA_LPS_WB_48h                      | 0,1005 |    | 0,0377 | 0,0628  | FALSE |
| IL6_S.typhimurium_macroPG_24h        | 0,0990 |    | 0,0689 | 0,0302  | FALSE |
| TNFA_LPS100ng_PBM_24h                | 0,0958 |    | 0,0489 | 0,0469  | FALSE |
| TNFA_Influenza_PBM_24h               | 0,0944 |    | 0,0470 | 0,0474  | FALSE |
| IL22_Bacteroides_PBM_7days           | 0,0918 |    | 0,0418 | 0,0500  | FALSE |
| IL1b_MSUC16_PBM_24h                  | 0,0918 |    | 0,0658 | 0,0260  | FALSE |
| TNFA_A.fumigatusconidiaSerum_PBM_24h | 0,0875 |    | 0,0706 | 0,0168  | FALSE |
| TNFA_C.conidiaHK_WB_48h              | 0,0803 |    | 0,0444 | 0,0359  | FALSE |
| TNFA_C.albicansconidia_macroPG_24h   | 0,0551 |    | 0,0454 | 0,0098  | FALSE |
| IFNy_PHA_WB_48h                      | 0,0545 |    | 0,0432 | 0,0113  | FALSE |
| IL1b_B.fragilis_PBM_24h              | 0,0530 |    | 0,0795 | -0,0266 | FALSE |
| IL6_LPS_macroPG_24h                  | 0,0499 |    | 0,0472 | 0,0027  | FALSE |
| IL22_B.burgdorferi_PBM_7days         | 0,0445 |    | 0,0373 | 0,0071  | FALSE |
| IFNy_C.conidiaHK_WB_48h              |        | NA | 0,0423 | NA      | NA    |
| IL1b_LPS1ng_PBM_24h                  |        | NA | 0,0468 | NA      | NA    |
| IL6_Influenza_PBM_24h                |        | NA | 0,0541 | NA      | NA    |
| IL6_C.albicanshyphae_PBM_24h         |        | NA | 0,0705 | NA      | NA    |

**Supplementary Table 5:** Genes associated to cytokine production and their corresponding correlation. The genes used in the multivariate linear models in order to predict the cytokine level of the cytokine indicated in the corresponding column.

| Ensembl id      | Gene id       | Type                 | Cytokine | Stimulus           | Spearman correlation |
|-----------------|---------------|----------------------|----------|--------------------|----------------------|
| ENSG00000068137 | PLEKHH3       | protein_coding       | IL1b     | C.albicans conidia | -0.4165293           |
| ENSG00000104140 | RHOV          | protein_coding       | IL1b     | C.albicans conidia | -0.3284836           |
| ENSG00000113916 | BCL6          | protein_coding       | IL1b     | C.albicans conidia | 0.4418956            |
| ENSG00000159263 | SIM2          | protein_coding       | IL1b     | C.albicans conidia | -0.2905726           |
| ENSG00000165304 | MELK          | protein_coding       | IL1b     | C.albicans conidia | 0.4198718            |
| ENSG00000170627 | GTSF1         | protein_coding       | IL1b     | C.albicans conidia | 0.4158425            |
| ENSG00000182134 | TDRKH         | protein_coding       | IL1b     | C.albicans conidia | 0.4652015            |
| ENSG00000186994 | KANK3         | protein_coding       | IL1b     | C.albicans conidia | -0.3229853           |
| ENSG00000206535 | LNP1          | protein_coding       | IL1b     | C.albicans conidia | -0.3696429           |
| ENSG00000229512 | AC068580.5    | sense_intronic       | IL1b     | C.albicans conidia | -0.4175366           |
| ENSG00000243547 | HNRNPKP4      | pseudogene           | IL1b     | C.albicans conidia | 0.2808608            |
| ENSG00000246560 | RP11-10L12.4  | processed_transcript | IL1b     | C.albicans conidia | -0.3994048           |
| ENSG00000259826 | RP11-467D6.1  | antisense            | IL1b     | C.albicans conidia | -0.3519231           |
| ENSG00000259886 | U82695.10     | lincRNA              | IL1b     | C.albicans conidia | 0.4627747            |
| ENSG00000104140 | RHOV          | protein_coding       | TNFA     | C.albicans conidia | -0.5090318           |
| ENSG00000120440 | TTLL2         | protein_coding       | TNFA     | C.albicans conidia | -0.4101638           |
| ENSG00000122386 | ZNF205        | protein_coding       | TNFA     | C.albicans conidia | -0.3202647           |
| ENSG00000125266 | EFNB2         | protein_coding       | TNFA     | C.albicans conidia | 0.3934111            |
| ENSG00000144677 | CTDSPL        | protein_coding       | TNFA     | C.albicans conidia | -0.404446            |
| ENSG00000166816 | LDHD          | protein_coding       | TNFA     | C.albicans conidia | 0.3901372            |
| ENSG00000187486 | KCNJ11        | protein_coding       | TNFA     | C.albicans conidia | -0.4049497           |
| ENSG00000197927 | C2orf27A      | protein_coding       | TNFA     | C.albicans conidia | 0.3904299            |
| ENSG00000211789 | TRAV12-2      | TR_V_gene            | TNFA     | C.albicans conidia | -0.3933882           |
| ENSG00000225031 | EIF4BP7       | pseudogene           | TNFA     | C.albicans conidia | -0.4030495           |
| ENSG00000228126 | LINC00568     | lincRNA              | TNFA     | C.albicans conidia | -0.4059461           |
| ENSG00000242970 | AC068522.4    | pseudogene           | TNFA     | C.albicans conidia | -0.3943491           |
| ENSG00000258702 | RP11-433J8.1  | lincRNA              | TNFA     | C.albicans conidia | 0.4037548            |
| ENSG00000260360 | RP11-533E19.5 | lincRNA              | TNFA     | C.albicans conidia | 0.399043             |
| ENSG00000068137 | PLEKHH3       | protein_coding       | IL6      | C.albicans conidia | -0.3970741           |
| ENSG00000100033 | PRODH         | protein_coding       | IL6      | C.albicans conidia | -0.3295863           |
| ENSG00000104140 | RHOV          | protein_coding       | IL6      | C.albicans conidia | -0.3564184           |
| ENSG00000114790 | ARHGEF26      | protein_coding       | IL6      | C.albicans conidia | -0.3317098           |
| ENSG00000131373 | HACL1         | protein_coding       | IL6      | C.albicans conidia | 0.4119782            |
| ENSG00000165304 | MELK          | protein_coding       | IL6      | C.albicans conidia | 0.4255543            |
| ENSG00000169750 | RAC3          | protein_coding       | IL6      | C.albicans conidia | -0.4544008           |
| ENSG00000170627 | GTSF1         | protein_coding       | IL6      | C.albicans conidia | 0.3410295            |
| ENSG00000180730 | SHISA2        | protein_coding       | IL6      | C.albicans conidia | -0.4276259           |
| ENSG00000206535 | LNP1          | protein_coding       | IL6      | C.albicans conidia | -0.3165787           |
| ENSG00000243547 | HNRNPKP4      | pseudogene           | IL6      | C.albicans conidia | 0.4551334            |
| ENSG00000246560 | RP11-10L12.4  | processed_transcript | IL6      | C.albicans conidia | -0.4290342           |
| ENSG00000259826 | RP11-467D6.1  | antisense            | IL6      | C.albicans conidia | -0.4233107           |



**Supplementary Table 6:** Description of the summary statistics used to calculate PRS and the date they were downloaded

| <b>Consortium</b> | <b>Trait</b>                      | <b>Pubmed id</b> | <b>Year</b> | <b>Downloaded</b> |
|-------------------|-----------------------------------|------------------|-------------|-------------------|
| DIAGRAM           | Type 2 Diabetes GWAS+metabochip   | 22885922         | 2012        | 5/29/2016         |
| EAGLE             | Eczema                            | 26482879         | 2015        | 5/30/2016         |
| GABRIEL           | Asthma (fixed effects)            | 860503           | 2010        | 5/14/2016         |
| GUGC              | Gout                              | 23263486         | 2013        | 5/31/2016         |
| IIBDGC            | Crohn's disease (Euro)            | 26192919         | 2015        | 5/30/2016         |
| IIBDGC            | Ulcerative colitis (Euro)         | 26192919         | 2015        | 5/30/2016         |
| IIBDGC            | Inflammatory Bowel Disease (Euro) | 26192919         | 2015        | 5/30/2016         |
| IMMUNOBASE        | Celiac disease                    | 22057235         | 2011        | 15/05/2016        |
| IMMUNOBASE        | Juvenile Idiopathic Arthritis     | 23603761         | 2011        | 15/05/2016        |
| IMMUNOBASE        | Multiple sclerosis                | 21833088         | 2011        | 15/05/2016        |
| IMMUNOBASE        | Primary biliary cirrhosis         | 26394269         | 2015        | 15/05/2016        |
| IMMUNOBASE        | Psoriasis                         | 23143594         | 2012        | 15/05/2016        |
| IMMUNOBASE        | Rheumatoid Arthritis              | 24390342         | 2014        | 15/05/2016        |
| IMMUNOBASE        | Systemic lupus erythematosus      | 26502338         | 2015        | 15/05/2016        |
| IMMUNOBASE        | T1D meta-study                    | 25751624         | 2015        | 15/05/2016        |

**Supplementary Table 7:** Results of t-test between mono and lymphocyte groups and their respective permuted distribution

| <b>Disease</b>                | <b>Cytokine type</b> | <b>Raw p-value</b> | <b>T-statistic</b> | <b>Degrees of freedom</b> | <b>Bonferroni p-value</b> |
|-------------------------------|----------------------|--------------------|--------------------|---------------------------|---------------------------|
| Type 2 Diabetes               | monocyte             | 1.22E-10           | 8.41               | 43.22                     | 2.08E-09                  |
| Type 1 Diabetes               | monocyte             | 2.11E-10           | 8.24               | 43.08                     | 3.59E-09                  |
| Inflammatory Bowel Disease    | lymphocyte           | 4.37E-09           | 9.29               | 22.06                     | 7.43E-08                  |
| Eczema                        | monocyte             | 1.39E-08           | 6.97               | 43.20                     | 2.37E-07                  |
| Rheumatoid Arthritis          | monocyte             | 3.98E-08           | 6.66               | 43.12                     | 6.77E-07                  |
| Type 2 Diabetes               | lymphocyte           | 1.62E-07           | 7.51               | 22.09                     | 2.76E-06                  |
| Multiple sclerosis            | lymphocyte           | 1.07E-06           | 6.65               | 22.08                     | 1.83E-05                  |
| Multiple sclerosis            | monocyte             | 2.31E-06           | -5.44              | 43.15                     | 3.93E-05                  |
| Ulcerative colitis            | lymphocyte           | 2.82E-05           | 5.25               | 22.08                     | 4.79E-04                  |
| Psoriasis                     | lymphocyte           | 5.37E-05           | 4.99               | 22.10                     | 9.12E-04                  |
| Inflammatory Bowel Disease    | monocyte             | 7.59E-04           | 3.62               | 43.11                     | 1.29E-02                  |
| Crohns disease                | monocyte             | 1.19E-03           | 3.47               | 43.14                     | 2.03E-02                  |
| Crohns disease                | lymphocyte           | 4.71E-03           | 3.14               | 22.07                     | 8.01E-02                  |
| Systemic lupus erythematosus  | monocyte             | 7.28E-03           | -2.82              | 43.14                     | 1.24E-01                  |
| Eczema                        | lymphocyte           | 2.72E-02           | 2.36               | 22.06                     | 4.63E-01                  |
| Asthma                        | monocyte             | 3.97E-02           | -2.12              | 43.11                     | 6.75E-01                  |
| Primary biliary cirrhosis     | monocyte             | 4.79E-02           | 2.04               | 43.12                     | 8.14E-01                  |
| Asthma                        | lymphocyte           | 9.90E-01           | -0.01              | 22.05                     | 1.00E+00                  |
| Celiac disease                | lymphocyte           | 8.66E-01           | -0.17              | 22.07                     | 1.00E+00                  |
| Celiac disease                | monocyte             | 1.60E-01           | 1.43               | 43.11                     | 1.00E+00                  |
| Gout                          | lymphocyte           | 2.33E-01           | -1.23              | 22.07                     | 1.00E+00                  |
| Gout                          | monocyte             | 9.76E-02           | -1.69              | 43.08                     | 1.00E+00                  |
| Juvenile Idiopathic Arthritis | lymphocyte           | 1.80E-01           | -1.39              | 22.05                     | 1.00E+00                  |
| Juvenile Idiopathic Arthritis | monocyte             | 6.87E-02           | 1.87               | 43.10                     | 1.00E+00                  |
| Primary biliary cirrhosis     | lymphocyte           | 9.88E-01           | -0.02              | 22.06                     | 1.00E+00                  |
| Psoriasis                     | monocyte             | 6.70E-01           | -0.43              | 43.08                     | 1.00E+00                  |
| Rheumatoid Arthritis          | lymphocyte           | 1.67E-01           | 1.43               | 22.05                     | 1.00E+00                  |
| Systemic lupus erythematosus  | lymphocyte           | 2.63E-01           | -1.15              | 22.07                     | 1.00E+00                  |
| Type 1 Diabetes               | lymphocyte           | 8.66E-01           | -0.17              | 22.04                     | 1.00E+00                  |
| Ulcerative colitis            | monocyte             | 1.44E-01           | -1.49              | 43.11                     | 1.00E+00                  |
